# Supplementary material for: Structure and nanomechanics of collagen fibrils in articular cartilage at different stages of osteoarthritis
Source: Royal Society of Chemistry journal article supplement (doi:10.1039/c4ra08997a), 2014-01-01
Supplement: c4ra08997a1.pdf [file c4ra08997a1.pdf]

1.

Table S1: Patients' age, sex and clinical diagnosis

| Patients | Age | Sex    | Clinical diagnosis             |
|----------|-----|--------|--------------------------------|
| OA 1     | 57  | male   | total knee replacement surgery |
| OA 2     | 62  | female | total knee replacement surgery |
| OA 3     | 65  | female | total knee replacement surgery |
| OA 4     | 63  | male   | total knee replacement surgery |
| OA 5     | 68  | male   | total knee replacement surgery |

2.

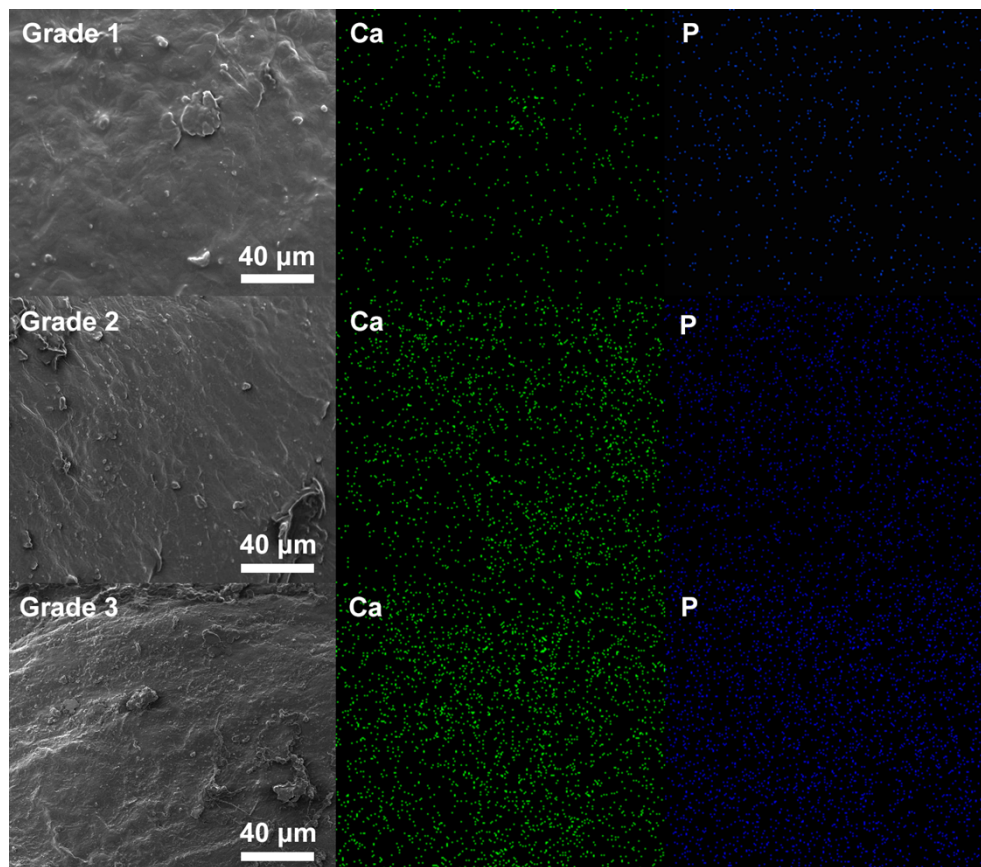

Figure S1: Typical SEM image and the distribution of Ca and P element in AC section at different stages of OA (Grade 1-3).

3.

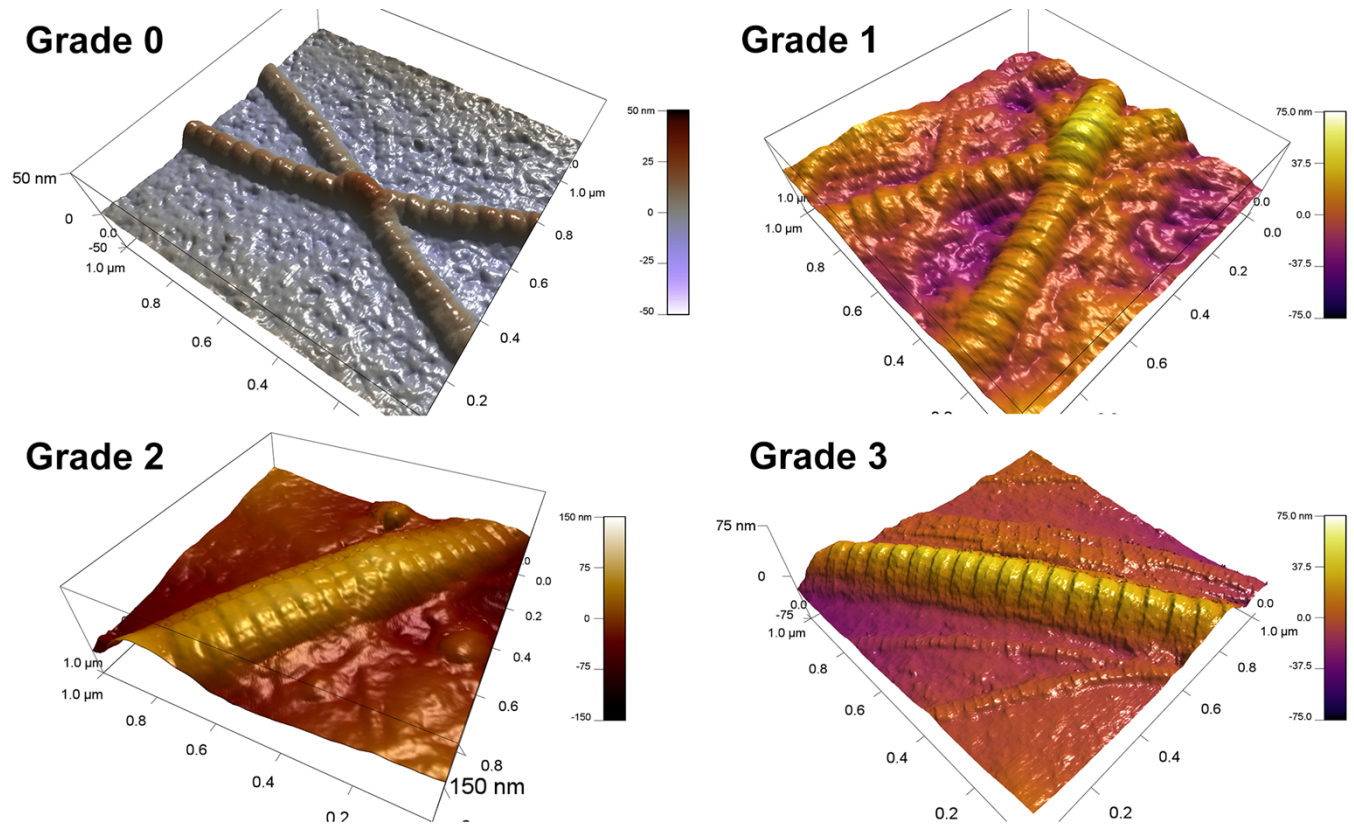

Figure S2: Typical 3D AFM image of individual collagen fibrils extracted from AC section at different stages of OA (Grade 0-3).
